# Supplementary material for: Supporting the ambulance service to safely convey fewer patients to hospital by developing a risk prediction tool: Risk of Adverse Outcomes after a Suspected Seizure (RADOSS)—protocol for the mixed-methods observational RADOSS project
Source: HighWire-hosted journal article supplement (doi:10.1136/bmjopen-2022-069156), 2022-11-01
Supplement: bmjopen-2022-069156supp002_data_supplement.pdf [file bmjopen-2022-069156supp002_data_supplement.pdf]

## SUPPLEMENTARY FILE 2

**TABLE S2.1** Range of structured data items that can be available to ambulance clinicians whilst on scene and will be included in data extract for RADOSS index events <sup>a, b</sup>

| Data items                                                                                                                                                                                | Ambulance data system recorded within |
|-------------------------------------------------------------------------------------------------------------------------------------------------------------------------------------------|---------------------------------------|
| ● Source of call (999, 111, police, other)                                                                                                                                                | CAD                                   |
| ● Relationship of the caller to the patient                                                                                                                                               | CAD                                   |
| ● Incident Date (day of week and month will be used)                                                                                                                                      | CAD                                   |
| ● Incident Time(s)                                                                                                                                                                        | CAD/PCR                               |
| ● Patient age                                                                                                                                                                             | PCR                                   |
| ● Patient sex                                                                                                                                                                             | CAD                                   |
| ● Patient ethnicity                                                                                                                                                                       | CAD                                   |
| ● Chief Complaint                                                                                                                                                                         | CAD                                   |
| ● Dispatch AMPD code and description <sup>c, d</sup>                                                                                                                                      | CAD                                   |
| ● Priority category for response time                                                                                                                                                     | CAD                                   |
| ● Location type (private residence/ public place/ place of work/education)                                                                                                                | PCR                                   |
| ● Incident location<br>(Index of Multiple Deprivation 2020 and subdomain decile scores (IMD2020) and Rural Urban Classification of incident location (RUC11CD) will be used) <sup>e</sup> | CAD/PCR                               |
| ● Presenting complaint                                                                                                                                                                    | PCR                                   |
| ● Clinician grade                                                                                                                                                                         | PCR                                   |
| ● Was patient transported                                                                                                                                                                 | PCR                                   |
| ● Type of facility transported to (ED, UTC, etc.)                                                                                                                                         | PCR                                   |
| ● Reason for non-transport                                                                                                                                                                | PCR                                   |
| ● Referral to other service - type                                                                                                                                                        | PCR                                   |
| ● Pre-alert to hospital                                                                                                                                                                   | PCR                                   |
| ● Physiological observations (e.g., pulse, BP, respiratory rate, oxygen saturation, level of consciousness AVPU, GCS, NEWS, blood sugar, temperature,)                                    | PCR                                   |
| ● Previous medical history reported                                                                                                                                                       | PCR                                   |
| ● Airway intervention – type                                                                                                                                                              | PCR                                   |
| ● Wound care provided                                                                                                                                                                     | PCR                                   |
| ● ECG findings                                                                                                                                                                            | PCR                                   |
| ● Cardiac or respiratory arrest present                                                                                                                                                   | PCR                                   |
| ● Cardiac or respiratory arrest outcome                                                                                                                                                   | PCR                                   |
| ● Advice provided (non-transported patients)                                                                                                                                              | PCR                                   |
| ● Supplementary oxygen provided                                                                                                                                                           | PCR                                   |
| ● Current medications                                                                                                                                                                     | PCR                                   |
| ● Drugs administered (name, dosage, route)                                                                                                                                                | PCR                                   |
| ● Time arrived scene                                                                                                                                                                      | PCR                                   |
| ● Time departed scene                                                                                                                                                                     | PCR                                   |

Notes: CAD, computer aid dispatch; PCR, patient care record; <sup>a</sup> Professional standards mean clinicians document findings from  $\geq 1$  set of observations[1]; <sup>b</sup> The RADOSS team will only have access to anonymised data; For reasons of governance and cost, the data extract for the index events will not

include free-text data entered by clinicians on ePCRs; <sup>c</sup> Like most services, the Yorkshire Ambulance Service use the Advanced Medical Priority System (AMPDS) to code reason for call. When a call is received regarding what is described as a suspected seizure then AMPDS Protocol 12 is activated. It prompts call handlers to ask standard questions about the presentation severity and the patient. The responses inform the specific subcode given to the call. One question asked is whether the patient has a diagnosis of epilepsy (i.e., “Is s/he an epileptic?”); <sup>d</sup> A minority (~5%) [2] of suspected seizure calls are transfers from ‘111’ rather than ‘999’ calls. As these calls were not managed via AMPDS, a slightly different data-set is available for them (e.g, disposition code). It will be included in the RADOSS data-extract. <sup>e</sup> These items will have been calculated based on LSOA codes by the central CURE’d team who have access to pseudoanonymised data..

## REFERENCES

1. Joint Royal Colleges Ambulance Liaison Committee/ Association of Ambulance Chief Executives, *JRCALC Clinical Guidelines 2019*, Bridgwater: Class Professional Publishing.
2. Hughes-Gooding, T., et al., *A data linkage study of suspected seizures in the urgent and emergency care system in the UK*. . Emergency Medicine Journal 2020. **10**: p. 605-610.
